# Supplementary material
Source: Springer Nature journal article supplement (https://www.springermedizin.de/resource/supplementary/13221_2013_56_MOESM3_ESM.pdf/9680900)

**A****<sup>3</sup>H-thymidine Uptake**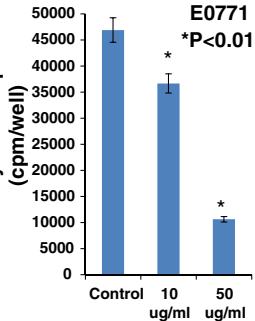**B****Cell #/View (0.7884 mm<sup>2</sup>)**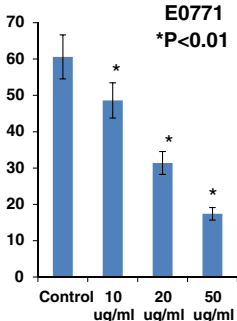**C****Proliferation Activity (%)**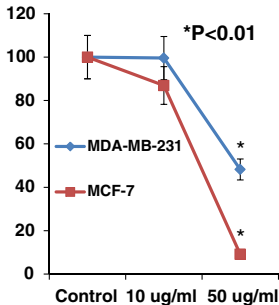

Supplement: MOESM3 [file 9680900]
